# Supplementary material for: Tomato SlAN11 regulates flavonoid biosynthesis and seed dormancy by interaction with bHLH proteins but not with MYB proteins
Source: PubMed Central journal article supplement (PMC5981465; doi:10.1038/s41438-018-0032-3), 2018-06-01
Supplement: 41438_2018_32_MOESM1_ESM.pdf [file 41438_2018_32_MOESM1_ESM.pdf]

**Supplementary Table 1** Primer sequences of *SIANI1* gene used in for construction vectors.

| <b>Gene</b>   | <b>Forward primer (5'→3')</b>         | <b>Reverse primer (5'→3')</b>      | <b>Vector type</b> |
|---------------|---------------------------------------|------------------------------------|--------------------|
| <i>SIANI1</i> | TCTCTAGAATGGAGAATTC<br>AAGTCAAGAATC   | GAGCTCAAAACTCAATTTA<br>TCCCATTCG-3 | Overexpression     |
| <i>SIANI1</i> | GAGCTCGTCTGTTTCTGCT<br>GATGGATC       | GAATTCCTCTACCAAAGAA<br>AGACAGCC    | RNAi               |
| <i>SIANI1</i> | CTCGAGTCTAGAGTCTGTT<br>TCTGCTGATGGATC | AAGCTTCTCTACCAAAGAA<br>AGACAGCC    | RNAi               |
| <i>SIANI1</i> | TCTAGAATGGAGAATTCAA<br>GTCAAGAA       | CTCGAGTACTTTAAGCAGC<br>TGCAACT     | GFP                |
| <i>SIANI1</i> | GGTACCTGCTACTAATTTTG                  | TCTAGAATTTCTACTAGAGA               | GUS                |
| <i>Pro</i>    | TGAGTGAAG                             | TTATAATTGAAATG                     |                    |

**Supplementary Table 2** Primer sequences of related genes used in quantitative real-time PCR

| <b>Gene</b>    | <b>Forward primer (5'→3')</b> | <b>Reverse primer (5'→3')</b> |
|----------------|-------------------------------|-------------------------------|
| <i>SICHI</i>   | TCAAGGCTTCCAGGATATGTCC        | GGATGTCCCGAACTTCTCCTTG        |
| <i>SICHS</i>   | GGTAGCATAAGGGTAGCAGCC         | CTTAAATGGAGGCAAAGCACTT        |
| <i>SIF3'H</i>  | GGCGGAAACTTACTGATACAGA        | TGACTGTTGGTTTGATTACTTCG       |
| <i>SIDFR</i>   | CCAG GTCAGATTCCATAACGAG       | TGACTGTTGGTTTGATTACTTCG       |
| <i>SIFLS</i>   | CAATGGAGGTAGCAAGGGTC          | TGACTGTTGGTTTGATTACTTCG       |
| <i>SIBAN</i>   | ATCTCTCTGGCTGGTCCTTAC         | TGGGCTCGACAAACATCCTC          |
| <i>SITTG2</i>  | CTCATCCACAAATGTTTCGTTCTG      | CCTTGGGTTTCTCTACCGATTG        |
| <i>SIANI1</i>  | ATTGGAATGAAGTGGAGCCG          | CCATCAGCAGAAACAGACGC          |
| <i>SIABI3</i>  | ATTGGGACTTGTCGTGTTTGG         | CCACACTTTATGTCGGCGTAT         |
| <i>SIABI5</i>  | GTAGAATGGGAAACGGTAGCG         | ATCCGACGACACGGGACTTAG         |
| <i>SIUBI3</i>  | AGGTTGATGACACTGGAAAGGTT       | AATCGCCTCCAGCCTTGTTGTA        |
| <i>SIANTI1</i> | GAAAAGTTGTAGATTGAGGTGGC       | CCAATAGTTTTTACATCGTTAGC       |
| <i>SIANI2</i>  | ATCGTTGGGAGTTAGGAAAGG         | GATAGTTTAGCCACCTTAGTCTGC      |
| <i>SIGL3</i>   | GCCAAGGGTTACCAGGGA            | GAGGTTAGGATCTTCCGTGACA        |
| <i>SITT8</i>   | TTCCTCTCTTGACGGTGTTG          | CCGAAGTGGAGTGCTCAGATAAA       |

**Supplementary Table 3** Primer sequences of related genes used in Yeast one/two-hybrid assays

| <b>Gene</b>   | <b>Forward primer (5'→3')</b>            | <b>Reverse primer (5'→3')</b>       |
|---------------|------------------------------------------|-------------------------------------|
| <i>SIAN11</i> | CCGCGGATGGAGAATTCAAGTCAA<br>GAA          | CTCGAGTTATACTTTAAGCAGCTG<br>CAA     |
| <i>SIANT1</i> | TCTAGAGAATTCATGAACAGTACAT<br>CTATGTCTTCA | CTCGAGTTAATCAAGTAGATTCCA<br>TAAGTC  |
| <i>SIAN2</i>  | TCTAGAGAATTCATGAATACTCCTA<br>TGTGTGCATC  | CTCGAGCTCTAATATAAAATATCAA<br>ACGTCG |
| <i>SIGL3</i>  | GGATCCCCGCGGATGGCTATGGGA<br>CACCAA       | CTCGAGGACCAACCTTGACTGACT<br>AATC    |
| <i>SITT8</i>  | TCTAGAGAATTCATGGAGATTATAC<br>AGCCTAATAGC | CTCGAGGAAAGAGCTGAGCAAATT<br>ATAG    |

```

*:*:*:* : *:*:*:*:*:*:*:*:*:*:*:*:*:*:*:*:*:*:*:*:*:*:*:*:*:*:*:*:*:*:*:*:*:*:*:*:*:*:*:*:*:*:*:*:*:*:*:*:*:*:*:*:*:*:*:*:*:*:*:*:*:*:*:*
SIAN11 MENSQES -HLRSENVVYDSSVPIVAMAFSSPTSLNRRRLAVGSPFIEFNRRVILSDPDDLLKLPVPLSPFHPFPPTLMFHPNPASBLK--INDILASSGDVLRWLDVT--DSETEPLFPLS 125
SIAN11 MENSQES -HLRSENVVYDSSVPIVAMAFSSPTSLNRRRLAVGSPFIEFNRRVILSDPDDLLKLPVPLSPFHPFPPTLMFHPNPASBLK--INDILASSGDVLRWLDVT--DSETEPLFPLS 125
StTTG1 MNSQES -HLRSENVVYDSSVPIVAMAFSSPTSLNRRRLAVGSPFIEFNRRVILSDPDDLLKLPVPLSPFHPFPPTLMFHPNPASBLK--INDILASSGDVLRWLDVT--DSETEPLFPLS 125
NaTTG1 MENSQES -HLRSENVVYDSSVPIVAMAFSSPTSLNRRRLAVGSPFIEFNRRVILSDPDDLLKLPVPLSPFHPFPPTLMFHPNPASBLK--INDILASSGDVLRWLDVT--DSETEPLFPLS 125
PhAN11 MENSQES -HLRSENVVYDSSVPIVAMAFSSPTSLNRRRLAVGSPFIEFNRRVILSDPDDLLKLPVPLSPFHPFPPTLMFHPNPASBLK--INDILASSGDVLRWLDVT--DSETEPLFPLS 120
PpFWD MENSQES -HLRSENVVYDSSVPIVAMAFSSPTSLNRRRLAVGSPFIEFNRRVILSDPDDLLKLPVPLSPFHPFPPTLMFHPNPASBLK--INDILASSGDVLRWLDVT--DSETEPLFPLS 116
VvWDR1 MNSQES -HLRSENVVYDSSVPIVAMAFSSPTSLNRRRLAVGSPFIEFNRRVILSDPDDLLKLPVPLSPFHPFPPTLMFHPNPASBLK--INDILASSGDVLRWLDVT--DSETEPLFPLS 119
PgWD40 MNSQES -HLRSENVVYDSSVPIVAMAFSSPTSLNRRRLAVGSPFIEFNRRVILSDPDDLLKLPVPLSPFHPFPPTLMFHPNPASBLK--INDILASSGDVLRWLDVT--DSETEPLFPLS 117
Mtd40-1 MNSQES -HLRSENVVYDSSVPIVAMAFSSPTSLNRRRLAVGSPFIEFNRRVILSDPDDLLKLPVPLSPFHPFPPTLMFHPNPASBLK--INDILASSGDVLRWLDVT--DSETEPLFPLS 125
MdtTG1 MNSQES -HLRSENVVYDSSVPIVAMAFSSPTSLNRRRLAVGSPFIEFNRRVILSDPDDLLKLPVPLSPFHPFPPTLMFHPNPASBLK--INDILASSGDVLRWLDVT--DSETEPLFPLS 125
PtTTG1 MENSQES -HLRSENVVYDSSVPIVAMAFSSPTSLNRRRLAVGSPFIEFNRRVILSDPDDLLKLPVPLSPFHPFPPTLMFHPNPASBLK--INDILASSGDVLRWLDVT--DSETEPLFPLS 123
AtTTG1 MNSAPES -LSRHTAVVYDSSVPIVAMAFSSPTSLNRRRLAVGSPFIEFNRRVILSDPDDLLKLPVPLSPFHPFPPTLMFHPNPASBLK--INDILASSGDVLRWLDVT--DSETEPLFPLS 124
ruler 1.....10.....20.....30.....40.....50.....60.....70.....80.....90.....100.....110.....120.....130

*:*:*:*:*:*:*:*:*:*:*:*:*:*:*:*:*:*:*:*:*:*:*:*:*:*:*:*:*:*:*:*:*:*:*:*:*:*:*:*:*:*:*:*:*:*:*:*:*:*:*:*:*:*:*:*:*:*:*:*:*:*:*:*
SIAN11 NKTSEYCAPLTSFDWNEVPRRIGSSIDITTCIWDVEKGVVEQLLAHDKVVVDIAWGEAGVFASVADGQVRIFDLRKKEHSTIIVESPDPDLLRLAWKQDLRYMATILMDSNKKVILIRSEPA 255
StAN11 NKTSEYCAPLTSFDWNEVPRRIGSSIDITTCIWDVEKGVVEQLLAHDKVVVDIAWGEAGVFASVADGQVRIFDLRKKEHSTIIVESPDPDLLRLAWKQDLRYMATILMDSNKKVILIRSEPA 255
SmTTG1 NKTSEYCAPLTSFDWNEVPRRIGSSIDITTCIWDVEKGVVEQLLAHDKVVVDIAWGEAGVFASVADGQVRIFDLRKKEHSTIIVESPDPDLLRLAWKQDLRYMATILMDSNKKVILIRSEPA 255
NaTTG1 NKTSEYCAPLTSFDWNEVPRRIGSSIDITTCIWDVEKGVVEQLLAHDKVVVDIAWGEAGVFASVADGQVRIFDLRKKEHSTIIVESPDPDLLRLAWKQDLRYMATILMDSNKKVILIRSEPA 255
PhAN11 NKTSEYCAPLTSFDWNEVPRRIGSSIDITTCIWDVEKGVVEQLLAHDKVVVDIAWGEAGVFASVADGQVRIFDLRKKEHSTIIVESPDPDLLRLAWKQDLRYMATILMDSNKKVILIRSEPA 250
PpFWD NKTSEYCAPLTSFDWNEVPRRIGSSIDITTCIWDVEKGVVEQLLAHDKVVVDIAWGEAGVFASVADGQVRIFDLRKKEHSTIIVESPDPDLLRLAWKQDLRYMATILMDSNKKVILIRSEPA 246
VvWDR1 NKTSEYCAPLTSFDWNEVPRRIGSSIDITTCIWDVEKGVVEQLLAHDKVVVDIAWGEAGVFASVADGQVRIFDLRKKEHSTIIVESPDPDLLRLAWKQDLRYMATILMDSNKKVILIRSEPA 249
PgWD40 NKTSEYCAPLTSFDWNEVPRRIGSSIDITTCIWDVEKGVVEQLLAHDKVVVDIAWGEAGVFASVADGQVRIFDLRKKEHSTIIVESPDPDLLRLAWKQDLRYMATILMDSNKKVILIRSEPA 247
Mtd40-1 NKTSEYCAPLTSFDWNEVPRRIGSSIDITTCIWDVEKGVVEQLLAHDKVVVDIAWGEAGVFASVADGQVRIFDLRKKEHSTIIVESPDPDLLRLAWKQDLRYMATILMDSNKKVILIRSEPA 255
MdtTG1 NKTSEYCAPLTSFDWNEVPRRIGSSIDITTCIWDVEKGVVEQLLAHDKVVVDIAWGEAGVFASVADGQVRIFDLRKKEHSTIIVESPDPDLLRLAWKQDLRYMATILMDSNKKVILIRSEPA 255
PtTTG1 NKTSEYCAPLTSFDWNEVPRRIGSSIDITTCIWDVEKGVVEQLLAHDKVVVDIAWGEAGVFASVADGQVRIFDLRKKEHSTIIVESPDPDLLRLAWKQDLRYMATILMDSNKKVILIRSEPA 253
AtTTG1 NKTSEYCAPLTSFDWNEVPRRIGSSIDITTCIWDVEKGVVEQLLAHDKVVVDIAWGEAGVFASVADGQVRIFDLRKKEHSTIIVESPDPDLLRLAWKQDLRYMATILMDSNKKVILIRSEPA 254
ruler 1.....140.....150.....160.....170.....180.....190.....200.....210.....220.....230.....240.....250.....260

*:*:*:*:*:*:*:*:*:*:*:*:*:*:*:*:*:*:*:*:*:*:*:*:*:*:*:*:*:*:*:*:*:*:*:*:*:*:*:*:*:*:*:*:*:*:*:*:*:*:*:*:*:*:*:*:*:*:*:*:*:*:*
SIAN11 MPVALLERHQASVNAIWAPOCRHICSGDDGQALIWELPTVAGPNGIDPMSVYLAGASINQLWSAARPMWIAIFSNKLLKLV 342
StAN11 MPVALLERHQASVNAIWAPOCRHICSGDDGQALIWELPTVAGPNGIDPMSVYLAGASINQLWSAARPMWIAIFSNKLLKLV 320
StTTG1 MPVALLERHQASVNAIWAPOCRHICSGDDGQALIWELPTVAGPNGIDPMSVYLAGASINQLWSAARPMWIAIFSNKLLKLV 342
NaTTG1 MPVALLERHQASVNAIWAPOCRHICSGDDGQALIWELPTVAGPNGIDPMSVYLAGASINQLWSAARPMWIAIFSNKLLKLV 342
PhAN11 MPVALLERHQASVNAIWAPOCRHICSGDDGQALIWELPTVAGPNGIDPMSVYLAGASINQLWSAARPMWIAIFSNKLLKLV 337
PpFWD MPVALLERHQASVNAIWAPOCRHICSGDDGQALIWELPTVAGPNGIDPMSVYLAGASINQLWSAARPMWIAIFSNKLLKLV 333
VvWDR1 MPVALLERHQASVNAIWAPOCRHICSGDDGQALIWELPTVAGPNGIDPMSVYLAGASINQLWSAARPMWIAIFSNKLLKLV 336
PgWD40 MPVALLERHQASVNAIWAPOCRHICSGDDGQALIWELPTVAGPNGIDPMSVYLAGASINQLWSAARPMWIAIFSNKLLKLV 334
Mtd40-1 MPVALLERHQASVNAIWAPOCRHICSGDDGQALIWELPTVAGPNGIDPMSVYLAGASINQLWSAARPMWIAIFSNKLLKLV 342
MdtTG1 MPVALLERHQASVNAIWAPOCRHICSGDDGQALIWELPTVAGPNGIDPMSVYLAGASINQLWSAARPMWIAIFSNKLLKLV 342
PtTTG1 MPVALLERHQASVNAIWAPOCRHICSGDDGQALIWELPTVAGPNGIDPMSVYLAGASINQLWSAARPMWIAIFSNKLLKLV 340
AtTTG1 MPVALLERHQASVNAIWAPOCRHICSGDDGQALIWELPTVAGPNGIDPMSVYLAGASINQLWSAARPMWIAIFSNKLLKLV 341
ruler 1.....270.....280.....290.....300.....310.....320.....330.....340.....

```

**Supplementary Figure S1** Alignment of deduced amino acid sequences of plant homologues to the Arabidopsis TTG1/WD40 protein.

The WD40 repeat domains are indicated with open boxes. The name of the proteins, their source and GenBank accession numbers are as follows: SIAN11 isolated from *Solanum lycopersicum* (tomato) (XP\_004235332); SpTTG1-like from *Solanum pennellii* (XP\_015067455); StAN11 from *Solanum tuberosum* (potato) (AEF01097); SmTTG1 from *Solanum melongena* (AJN91103); PhAN11 from *Petunia x hybrid* (AAC18914); PtTTG1 from *Populus trichocarpa* (XP\_002318500); MtWD40-1 from *Medicago truncatula* (XP\_003602392); PpFWD from *Perilla frutescens* (BAB58883); MdtTG1-like from *Malus domestica* (NP\_001315674); AtTTG1 from *Arabidopsis thaliana* (CAC10524), NtTTG1 from *Nicotiana tabacum* (ACJ06978); PgWD40 from *Punica granatum* (ADV40946); VvWDR1 from *Vitis vinifera* (NP\_001268101); NaTTG1 from *Nicotiana attenuate* (OIT04713); IpWDR from *Ipomoea purpurea* (ABW69689); SiTTG1 from *Sesamum indicum* (XP\_011075888); RiTTG1 from *Rubus sidaeus* (AEI55401); FaTTG1 from *Fragaria x ananassa* (AFL02466); MnTTG1 from *Morus notabilis* (XP\_010099415).

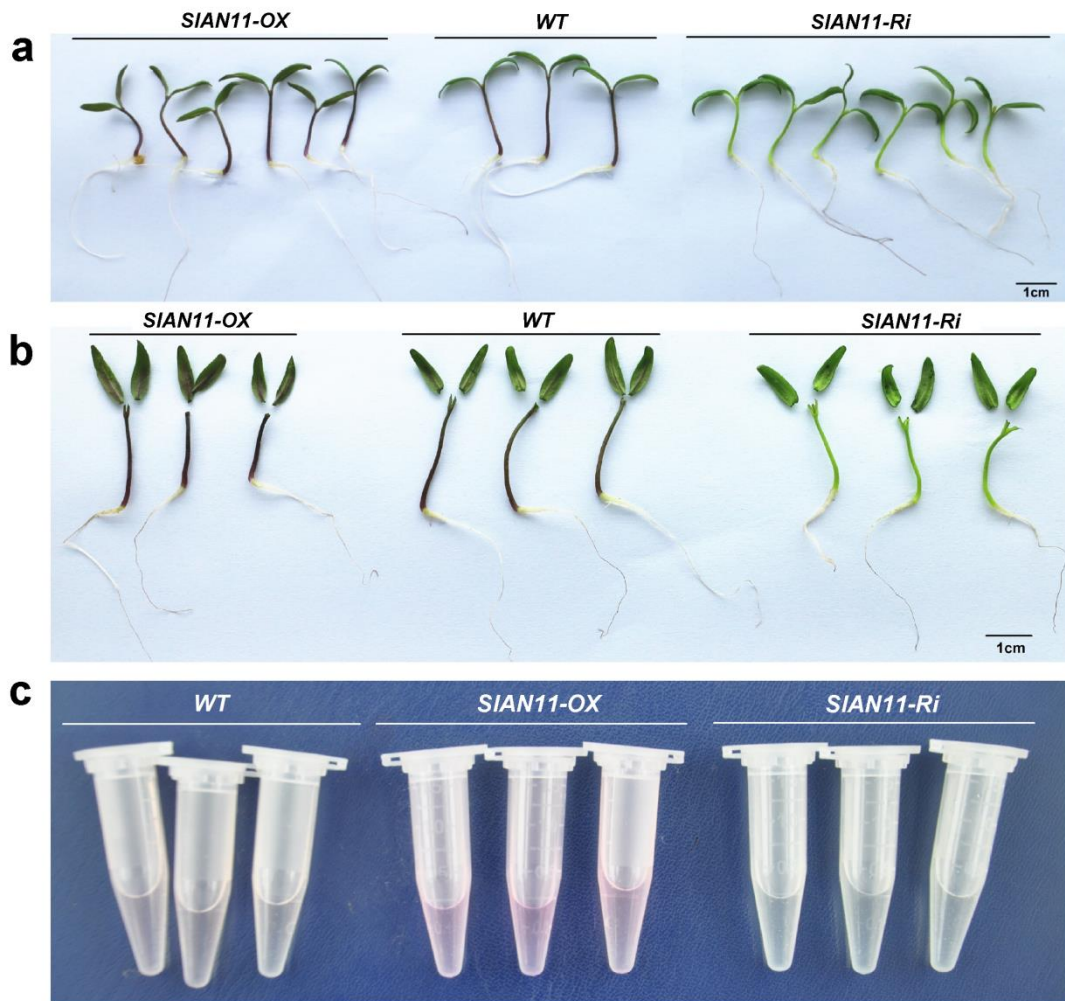

**Supplementary Figure S2** Phenotypes of anthocyanins accumulation of wildtype and *SIAN11* transgenic seedlings

(a, b) Phenotypes of anthocyanins accumulation in cotyledons and hypocotyl from wild-type (WT), *35S::SIAN11* (*SIAN11-OX*) and *SIAN11-RNAi* (*SIAN11-Ri*) transgenic seedlings. (c) Extracts of anthocyanins from 5-days old seedlings. The seedlings were grown in 1/2MS culture bottle and observed 5 days after germination.

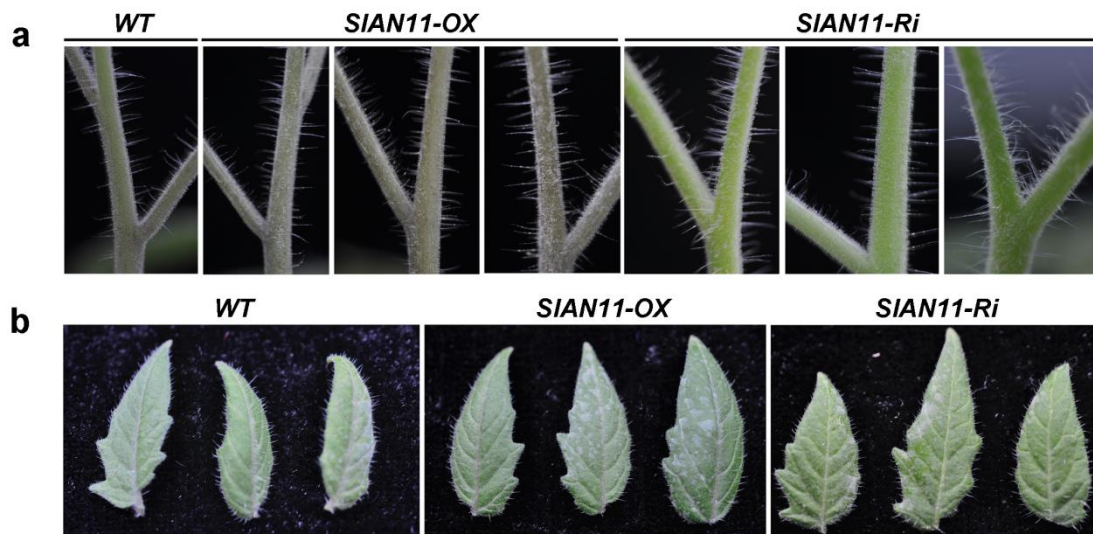

**Supplementary Figure S3** *SIAN11* does not affect trichome development in tomato plants

(a, b) Trichomes of stems and leaves from 30d-old wild-type (WT), *35S::SIAN11* (*SIAN11-OX*) and *SIAN11-RNAi* (*SIAN11-Ri*) transgenic plants.



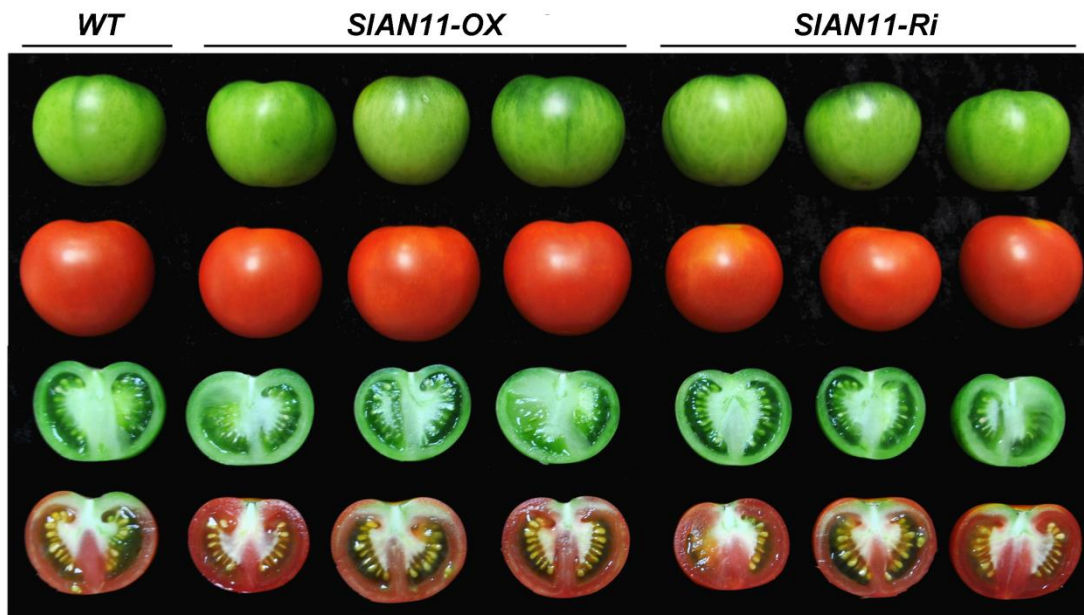

**Supplementary Figure S4** No anthocyanins accumulation in *SIAN11* transgenic tomato fruits.

Phenotype of *35S::SIAN11* and *SIAN11-RNAi* lines compared to the control non-transformed plants (Ailsa Craig). Details of immature green fruits, section of the immature green fruits, red ripened fruits and section of the red fruits are shown.

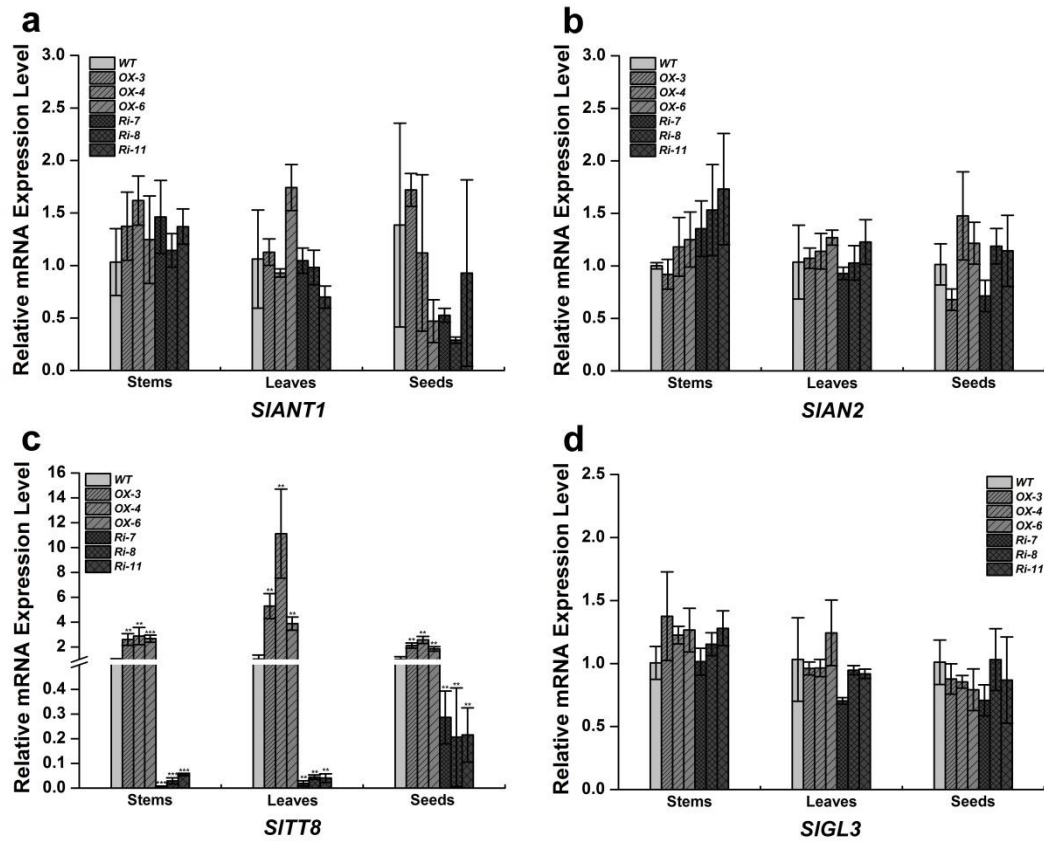

**Supplementary Figure S5** Expression levels analysis of the endogenous *bHLH* and *MYB* genes in stems, leaves and seeds of wildtype and *SIAN11* transgenic lines.

Total RNAs were extracted from stems, leaves and mature seeds. Relevant mRNA levels were quantified by quantitative RT-PCR and are indicated as relative expression levels compared with the internal control *SIUBI3* mRNA. Results represent mean values  $\pm$  SD from three biological replicates. Asterisks indicate statistically significant differences (\* $P < 0.05$ , \*\* $P < 0.01$ , \*\*\* $P < 0.001$ ; *t*-test).
